# Supplementary material for: High-Fidelity Prototyping for Mobile Electronic Data Collection Forms Through Design and User Evaluation
Source: PubMed Central journal article supplement (PMC6450481; doi:10.2196/11852), 2019-03-22
Supplement: humanfactors_v6i1e11852_app1.pdf [file humanfactors_v6i1e11852_app1.pdf]

Multimedia Appendix 1:

**Design Prototype for Mobile EDC Forms** 0 %

**Participant ID no/Unique Subject Identifier (USI)**  
Please type here

**Interviewer name**  
Please type here

**Interviewer telephone number**  
Please type here

**Current date**  
07/04/2018

**CONTINUE**

Figure 1a: The demographic section

**Design Prototype for Mobile EDC Forms** 44 %

**SI-3. How much did it cost you to buy materials to go with to the place of delivery?**

Clothes  
\_\_\_\_\_ UGX  Don't know or don't remember

Cotton  
\_\_\_\_\_ UGX  Don't know or don't remember

Gauze  
\_\_\_\_\_ UGX  Don't know or don't remember

Plastic sheet  
\_\_\_\_\_ UGX  Don't know or don't remember

Basin  
\_\_\_\_\_ UGX  Don't know or don't remember

**PREVIOUS** **NEXT**

Figure 1b: The list pickers

In the demographic section (Figure 1a), the RAs were required to fill in a participant ID, interviewer name and the interviewer telephone number, the date automatically updated. The participant ID had to be between 1000-9999, the interviewer name included the first and the last name and had to consist of at least 10 letters, and the telephone number was comprised of 10 numbers. It was not possible for the user to proceed without filling in these fields correctly. The progress status on continuation to the next screen was represented by an increase in percentage, and the users could navigate the prototype by either swiping or by using the navigation buttons in the form.

Design Prototype for Mobile EDC Forms 66 %

**SII-1. Since birth has the child ever been admitted to hospital?**

Yes  No

**SVII2.** How many times has the child been admitted to the hospital?

1  2  3  4  5

**SVII3.** What was the reason for hospitalization?

**SVII4.** For how many days was the child in hospital?

**SVII5.** Do you have medical records?

|         |         |         |         |
|---------|---------|---------|---------|
| Visit 1 | SVII3 ▼ | SVII4 ▼ | SVII5 ▼ |
| Visit 2 | SVII3 ▼ | SVII4 ▼ | SVII5 ▼ |
| Visit 3 | SVII3 ▼ | SVII4 ▼ | SVII5 ▼ |

**PREVIOUS** **NEXT**

Figure 2a: The child's sickness record

Design Prototype for Mobile EDC Forms 88 %

Thank you for filling the form. If you wish to submit the form, please go ahead and press the submit button. Please note that you will not be able to edit the data in the form once it is submitted.

If you wish to review the form once more before submission, please press the previous button on this screen.

**PREVIOUS** **SUBMIT**

Figure 2b: The submission screen

Section I of the prototype was concerned with list pickers (single choice and multiple choice pickers) (Figure 1b). In the single choice list picker, the participants were required to select only one option here, and if they chose the 'other' option, they were required to specify that option. The participants could pick more than one option in the multiple choice option, and could still specify the 'other option' if selected. It was not possible to continue to the next screen unless the fields were filled appropriately. Still in this section, members were required to fill in the cost of the materials they used when going to hospital. In case they didn't know or couldn't remember how much they spent, the 'don't know' or 'don't remember' option was available. Since this was being tested in Uganda, the users were required to type a value of 4 digits or more. It was also not possible to select 'don't know' and to type a cost against the same item. Every item in the form either had to have a cost or a 'don't know' or 'don't remember' against it before the user could continue to the next screen.

Design Prototype for Mobile EDC Forms 0 %

**Participant ID no/Unique Subject Identifier (USI)**

578

✘ Must be between 1000-9999

**Interviewer name**

Emma

✘ Must contain first name and last name, minimum 10 letters.

**Interviewer telephone number**

9876543789

✔ Correct

**Current date**

07/04/2018

CONTINUE

Design Prototype for Mobile EDC Forms 44 %

**SI-3. How much did it cost you to buy materials to go with to the place of delivery?**

Clothes Requires a numerical response or don't know

UGX  Don't know or don't remember

Cotton

567 UGX  Don't know or don't remember

Type 4 digits or more

Gauze

UGX  Don't know or don't remember

Plastic sheet

98765 UGX  Don't know or don't remember

Basin

UGX  Don't know or don't remember

Type 4 digits or more

PREVIOUS NEXT

Figure 3a: Validation testing screen

Figure 3b: Screen indicating feedback

Section II of the prototype showed different table designs capturing a child's sickness record (Figure 2a). The participant was required to indicate if a child had been hospitalized or not. If the child had not been hospitalized before, the participant would be requested to submit the form. However, if the child had been admitted, the number of times a baby had been hospitalized, the reason for the hospitalization, the number of days for each hospitalization and whether the medical records were available or not were recorded. Each of these options had a drop down list from where the RAs were required to select what they felt the correct option was.

Design Prototype for Mobile EDC Forms 66 %

**SII-1. Since birth has the child ever been admitted to hospital?**

Yes  No

**SVII2. How many times has the child been admitted to the hospital?**

1  2  3  4  5

**SVII3. What was the reason for hospitalization?**

**SVII4. For how many days was the child in hospital?**

**SVII5. Do you have medical records?**

|         |          |   |     |
|---------|----------|---|-----|
| Visit 1 | Ear disc | 5 | Yes |
| Visit 2 | Tempei   | 3 | No  |
| Visit 3 | Baby's l | 1 | No  |

PREVIOUS NEXT

Design Prototype for Mobile EDC Forms 77 %

**Summary of SII-1. Since birth has the child ever been admitted to hospital?**

Visit 1: reason for hospitalization "Ear discharge". The child spent 5 days in the hospital and medical records exist (Yes).

Visit 2: reason for hospitalization "Temperature < 35.5C or > 37.5C". The child spent 3 days in the hospital and medical records exist (No).

Visit 3: reason for hospitalization "Baby's body too hot". The child spent 1 days in the hospital and medical records exist (No).

Is the information correct?  Yes  No

PREVIOUS NEXT

Figure 4a: Screen showing logic implementation Figure 4b: Summary of information from screen 4a
